# Supplementary material for: An in situ (K0.5Na0.5)NbO3-doped barium titanate foam framework and its cyanate ester resin composites with temperature-stable dielectric properties and low dielectric loss
Source: Royal Society of Chemistry journal article supplement (doi:10.1039/c9qm00006b), 2019-01-01
Supplement: c9qm00006b1.pdf [file c9qm00006b1.pdf]

**Electronic Supplementary Information**

***In-situ* (K<sub>0.5</sub>Na<sub>0.5</sub>)NbO<sub>3</sub> doped barium titanate foam framework and its cyanate ester resin composites with temperature-stable dielectric properties and low dielectric loss**

Longhui Zheng<sup>a, b</sup>, Li Yuan<sup>a</sup>, Guozheng Liang<sup>a\*</sup> and Aijuan Gu<sup>a\*</sup>

<sup>a</sup> State and Local Joint Engineering Laboratory for Novel Functional Polymeric Materials, Jiangsu Key Laboratory of Advanced Functional Polymer Design and Application, College of Chemistry, Chemical Engineering and Materials Science, Soochow University, Suzhou, 215123, China.

<sup>b</sup> Key Laboratory of Design and Assembly of Functional Nanostructures, Fujian Institute of Research on the Structure of Matter, Chinese Academy of Sciences, Fuzhou, 350000, China

\*To whom all correspondence should be addressed

Tel: +86 512 65880967

Fax: +86 512 65880089

Email: lgzheng@suda.edu.cn (Guozheng Liang), ajgu@suda.edu.cn (Aijuan Gu).

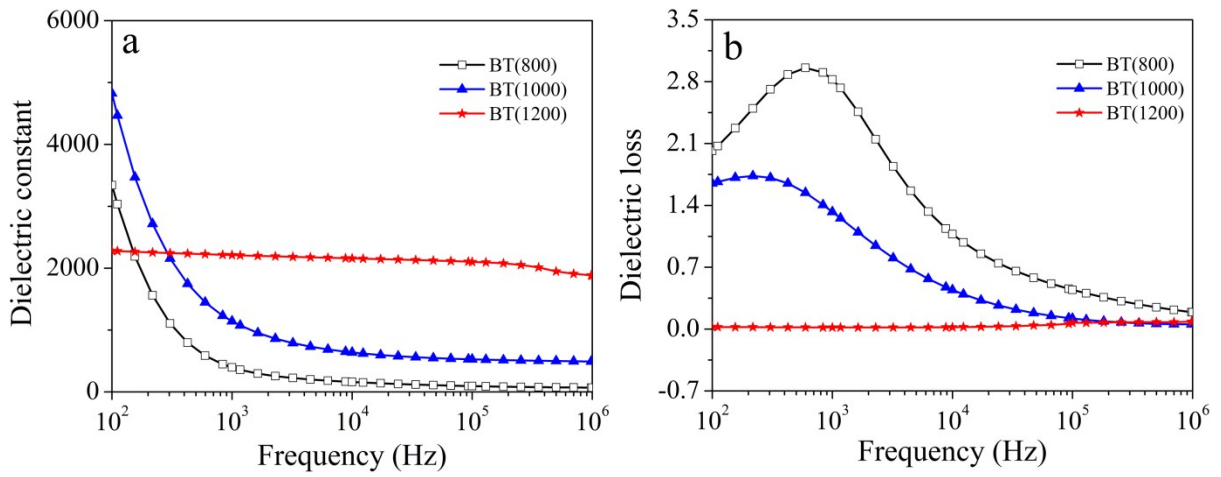

**Fig. S1** Frequency dependence of dielectric constant (a) and loss (b) at room temperature for BT at different sintered temperatures.

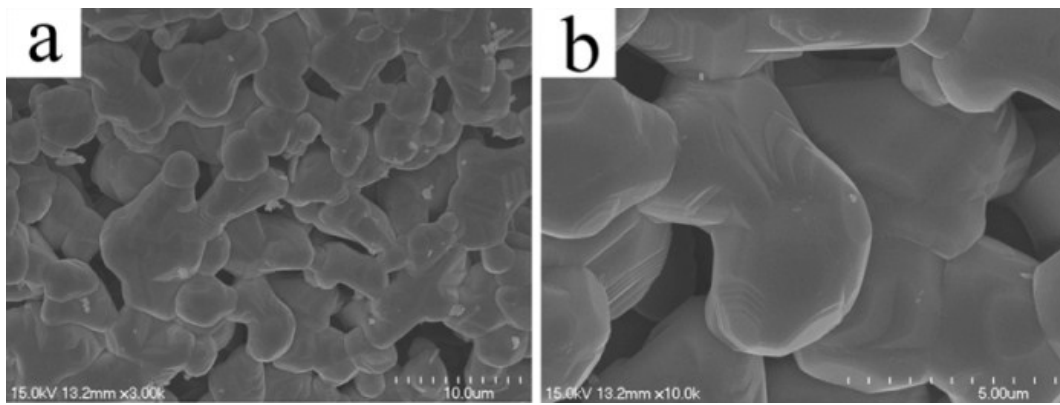

**Fig. S2** SEM images of 0dBTF5 prepared from BaCO<sub>3</sub> and TiO<sub>2</sub>.

**Table S1** Frequency coefficients of ceramic/polymer composites in literature <sup>a)</sup>

| Filler <sup>b)</sup>  | Filler loading (vol%) | Polymer matrix <sup>c)</sup> | $\alpha_f(k)$ (%) | Ref.  |
|-----------------------|-----------------------|------------------------------|-------------------|-------|
| 3D-BT                 | 30                    | EP                           | ~40.4             | [S1]  |
| BSCT                  | 33                    | PVDF                         | ~12.4             | [S2]  |
| BST                   | 30                    | ABS                          | ~7.3              | [S3]  |
| BST                   | 30                    | P(VDF-CTFE)                  | ~24.5             | [S4]  |
| BST                   | 30                    | P(VDF-TrFE)                  | ~20.0             | [S5]  |
| BT                    | 30                    | CR-S                         | ~11.1             | [S6]  |
| BT                    | 30                    | ENR-50                       | ~29.4             | [S7]  |
| BT                    | 30                    | EVM                          | ~11.7             | [S8]  |
| BT                    | 30                    | PVDF                         | ~21.6             | [S9]  |
| BT                    | 30                    | PVDF                         | ~23.5             | [S10] |
| BTF                   | 30.8                  | CE                           | ~13.7             | [S11] |
| BTF                   | 31.8                  | CE                           | 14.4              | [S12] |
| BTF                   | 31.8                  | cPES/CE                      | 3.8               | [S12] |
| BT-OPA                | 30                    | P(VDF-HFP)                   | ~14.5             | [S13] |
| BT@TiO <sub>2</sub>   | 30                    | P(VDF-HFP)                   | ~18.7             | [S14] |
| c-BT                  | 30                    | PVDF                         | ~16.7             | [S15] |
| CCTO                  | 30                    | CE                           | ~22.5             | [S16] |
| CCTO                  | 30                    | EP                           | ~12.0             | [S17] |
| CCTO                  | 30                    | PI                           | ~27.8             | [S18] |
| CCTO                  | 30                    | PVDF                         | ~18.2             | [S19] |
| CCTO                  | 30                    | PVDF                         | ~18.1             | [S20] |
| CCTO                  | 30                    | PVDF                         | ~26.9             | [S21] |
| CCTO                  | 30                    | SR                           | ~1.3              | [S22] |
| CCTO-sg               | 30                    | PVDF                         | ~13.0             | [S23] |
| CCTO-ss               | 30                    | PVDF                         | ~16.1             | [S23] |
| C <sub>fg</sub> -CCTO | 30                    | P(VDF-HFP)                   | ~17.1             | [S24] |
| FTN                   | 30                    | PVDF                         | ~63.0             | [S25] |
| h-BT                  | 30                    | PVDF                         | ~14.3             | [S15] |
| PLZST                 | 30                    | P(VDF-CTFE)                  | ~16.7             | [S26] |
| PZT                   | 30                    | PVDF                         | ~13.0             | [S10] |
| SiC                   | 36                    | P(VDF-CTFE-DB)               | ~19.6             | [S27] |
| TDPA-BT               | 30                    | PVDF                         | ~38.0             | [S28] |

a) The data of high- $k$  composites are arranged, while some of them not reported directly in the references are derived from the corresponding curves, the symbol “~” is used to indicate that the datum is an approximate value.

- b) 3D-BT: Three-dimensional BaTiO<sub>3</sub>. BCZT: Calcium barium zirconate titanate (Ba<sub>0.95</sub>Ca<sub>0.05</sub>Zr<sub>0.15</sub>Ti<sub>0.85</sub>O<sub>3</sub>). BST: Ba<sub>x</sub>Sr<sub>y</sub>TiO<sub>3</sub>. BT: Barium titanate. BTF: BT foam. BT-OPA: BT coated with octylphosphonic acid. BT@TiO<sub>2</sub>: TiO<sub>2</sub> shell layer encapsulates BaTiO<sub>3</sub> nanoparticles. c-BT: Crude BaTiO<sub>3</sub>. CCTO: CaCu<sub>3</sub>Ti<sub>4</sub>O<sub>12</sub>. CCTO-ss: CCTO were prepared by solid-state method. CCTO-sg: CCTO were prepared by sol-gel method. C<sub>fg</sub>-CCTO: Fine-ground citrate CCTO. FTN: FeTiNbO<sub>6</sub>. h-BT: Surface hydroxylated BT. PLZST: Lanthanum doped lead zirconate titanate stannate antiferroelectric ceramic (Pb<sub>0.97</sub>La<sub>0.02</sub>)(Zr<sub>0.63</sub>Sn<sub>0.3</sub>Ti<sub>0.07</sub>)O<sub>3</sub>. PZT: Lead zirconate titanate. SiC: Silicon carbide. TDPA-BT: Functionalize the surface of BT with 1-tetradecylphosphonic acid.
- c) EP: Epoxy. PVDF: Poly(vinylidene fluoride). ABS: Acrylonitrile-butadiene-styrene. P(VDF-CTFE): Poly(vinylidene fluoride-chlorotrifluoroethylene). P(VDF-TrFE): Poly(vinylidene fluoride-trifluoroethylene). CR-S: Cyanoethylated cellulose polymer. ENR-50: Epoxidized natural rubber with 50 mol% epoxide. EVM: Ethylene vinyl-acetate copolymer. CE: Cyanate ester. cPES: Phenolphthalein poly(ether sulfone). P(VDF-HFP): Poly(vinylidene fluoride-co-hexafluoropropylene). PI: Polyimide. SR: Silicone resin P(VDF-CTFE-DB): Poly(vinylidene fluoride-co-chlorotrifluoroethylene) with internal double bonds.

## References

- [S1] S. Luo, Y. Shen, S. Yu, Y. Wan, W. H. Liao, R. Sun and C. P. Wong, *Energy Environ. Sci.*, 2017, **10**, 137-144.
- [S2] E. Q. Huang, J. Zhao, J. W. Zha, L. Zhang, R. J. Liao and Z. M. Dang, *J. Appl. Phys.*, 2014, **115**, 194102.
- [S3] K. Zhang, F. Gao, J. Xu, L. Wang, Q. Zhang and J. Kong, *J. Mater. Sci.: Mater. Electron.*, 2017, **28**, 8960-8968.
- [S4] P. Wu, L. Zhang and X. Shan, *Mater. Lett.*, 2015, **159**, 72-75.
- [S5] L. Zhang, P. Wu, Y. Li, Z. Y. Cheng and J. C. Brewer, *Compos. Part B-Eng.*, 2014, **56**, 284-289.
- [S6] C. K. Chiang and R. Popielarz, *Ferroelectrics*, 2002, **275**, 1-9.
- [S7] S. Salaeh, G. Boiteux, P. Cassagnau and C. Nakason, *Int. J. Appl. Ceram. Technol.*, 2015, **12**, 106-115.
- [S8] X. Y. Huang, L. Y. Xie, P. K. Jiang, G. L. Wang and F. Liu, *J. Phys. D: Appl. Phys.*, 2009, **42**, 245407.
- [S9] Y. H. Li, J. J. Yuan, J. Xue, F. Y. Cai, F. Chen and Q. Fu, *Compos. Sci. Technol.*, 2015, **118**, 198-206.
- [S10] R. Gregorio, M. Cestari and F. E. Bernardino, *J. Mater. Sci.*, 1996, **31**, 2925-2930.
- [S11] L. H. Zheng, G. Z. Liang, A. J. Gu, L. Yuan and Q. B. Guan, *J. Mater. Chem. C*, 2016, **4**, 10654-10663.
- [S12] L. H. Zheng, L. Yuan, Q. B. Guan, G. Z. Liang and A. J. Gu, *Appl. Surf. Sci.*, 2018, **427**, 1046-1054.
- [S13] C. Ehrhardt, C. Fettkenhauer, J. Glenneberg, W. Münchgesang, C. Pientschke, T. Großmann, M. Zenkner, G. Wagner, H. S. Leipner, A. Buchsteiner, M. Diestelhorst, S. Lemm, H. Beige and S. G. Ebbinghaus, *Mater. Sci. Eng-B*, 2013, **178**, 881-888.
- [S14] M. Rahimabady, M. S. Mirshekarloo, K. Yao and L. Lu, *Phys. Chem. Chem. Phys.*, 2013, **15**, 16242-16248.
- [S15] T. Zhou, J. W. Zha, R. Y. Cui, B. H. Fan, J. K. Yuan and Z. M. Dang, *ACS Appl. Mater. Interfaces*, 2011, **3**, 2184-2188.
- [S16] Y. P. Shen, A. J. Gu, G. Z. Liang and L. Yuan, *Compos. Part A-Appl. Sci. Manuf.*, 2010, **41**, 1668-1676.
- [S17] B. Shri Prakash and K. B. R. Varma, *Compos. Sci. Technol.*, 2007, **67**, 2363-2368.

- [S18] Z. M. Dang, T. Zhou, S. H. Yao, J. K. Yuan, J. W. Zha, H. T. Song, J. Y. Li, Q. Chen, W. T. Yang and J. Bai, *Adv. Mater.*, 2009, **21**, 2077-2082.
- [S19] W. Yang, S. Yu, R. Sun and R. Du, *Acta Mater.*, 2011, **59**, 5593-5602.
- [S20] P. Thomas, K. T. Varughese, K. Dwarakanath and K. B. R. Varma, *Compos. Sci. Technol.*, 2010, **70**, 539-545.
- [S21] P. Thomas, *eXPRESS Polym. lett.*, 2010, **4**, 632-643.
- [S22] S. Babu, K. Singh and A. Govindan, *Appl. Phys. A-Mater.*, 2012, **107**, 697-700.
- [S23] X. Chao, P. Wu, Y. Zhao, P. Liang and Z. Yang, *J. Mater. Sci.: Mater. Electron.*, 2015, **26**, 3044-3051.
- [S24] C. Ehrhardt, C. Fettkenhauer, J. Glenneberg, W. Münchgesang, H. S. Leipner, M. Diestelhorst, S. Lemm, H. Beige and S. G. Ebbinghaus, *J. Mater. Chem. A*, 2014, **2**, 2266-2274.
- [S25] J. Fu, Y. Hou, Q. Wei, M. Zheng, M. Zhu and H. Yan, *J. Appl. Phys.*, 2015, **118**, 235502.
- [S26] F. Wen, X. Liu, Z. Xu, H. Tang, W. Bai, W. S. Zhao, P. Zheng, L. Wang and G. Wang, *Ceram. Int.*, 2017, **43**, 1504-1508.
- [S27] Y. Feng, H. Gong, Y. Xie, X. Wei, L. Yang and Z. Zhang, *J. Appl. Phys.*, 2015, **117**, 094104.
- [S28] H. J. Ye, W. Z. Shao and L. Zhen, *Colloids Surf. Physicochem. Eng. Aspects*, 2013, **427**, 19-25.
